1 Integrating Economic dynamics into Ecological Networks: The case of  
2 fishery sustainability

3 Paul Glaum\*<sup>1</sup>, Valentin Cocco<sup>2</sup>, Fernanda S. Valdovinos\*<sup>1,3</sup>

4  
5 1 – Department of Ecology and Evolutionary Biology University of Michigan 1105 North University Ann  
6 Arbor, MI 48109 USA, 734-615-4917

7 2 – École Normale Supérieure, Biology Department PSL Université Paris

8 3 – Center for the Study of Complex Systems, University of Michigan, MI, USA

9

10 \*Corresponding authors:

11 \*Fernanda S. Valdovinos: [fsvaldov@umich.edu](mailto:fsvaldov@umich.edu)

12 \*Paul Glaum: [prglaum@umich.edu](mailto:prglaum@umich.edu)

13

14 Short Title: Economic-Ecological Network Dynamics

15

16

17

18

19

20

21

22

23 **Classification:** Report

24 **Keywords:** network ecology, coupled natural-human systems, open access fishery, bio-energetic model,

25 allometric-trophic-network model, linear-price model

26 **Summary/Abstract**

27 Understanding and sustainably managing anthropogenic impact on ecosystems requires studying the  
28 integrated economic -ecological dynamics driving coupled human-natural systems. Here, we expand  
29 ecological network theory to study fishery sustainability by incorporating economic drivers into food-web  
30 models to evaluate the dynamics of thousands of single-species fisheries across hundreds of generated  
31 food-webs and two management strategies. Analysis reveals harvesting high population biomass species  
32 can initially support fishery persistence, but threatens long term economic and ecological sustainability by  
33 indirectly inducing extinction cascades in non-harvested species. This dynamic is exacerbated in open  
34 access fisheries where profit driven growth in fishing effort increases perturbation strength. Results  
35 demonstrate the unique insight into both ecological dynamics and sustainability garnered from  
36 considering economically dynamic fishing effort in the network.

37

38

39

40 One Sentence Summary: Integrating economic drivers into ecological networks reveal non-linear drivers  
41 of sustainability in fisheries.

42

43 **Main**

44 The advent of network theory in ecology and environmental studies has greatly advanced the  
45 study of ecological dynamics and complexity (1, 2). These advances have also translated into a growing  
46 knowledge of how human caused disturbances can create far-reaching ecological impacts through indirect  
47 effects (3-6). Often, however, the disturbances in these network studies have been studied as a one-time  
48 event or a constant external rate of change, separate from the dynamic elements of the network (3, 6, 7).  
49 We argue that developing both sustainable management practices and a fuller understanding of  
50 anthropocene ecological dynamics require recognition that much of the ecological impact of  
51 anthropogenic activity is determined by an integrated feedback process between ecological dynamics and

52 socio-economic conditions as a coupled natural-human system (8, 9). In short, the scope of ecological  
53 networks should contain humans as dynamic elements when necessary (10, 11). Here, we expand  
54 ecological network theory by incorporating economic dynamics into food-web models to evaluate the  
55 coupled natural-human dynamics affecting sustainability in the case of fisheries.

56 Fisheries are an important example of natural-human integrated network systems given their  
57 critical role in the economic stability and food security of billions of people (12). Both the available yield  
58 and mobilized fishing effort in any fishery are products of a complex set of interacting socio-economic  
59 and ecological factors (13, 14). Understanding the dynamics and consequences of these interactions is  
60 particularly pressing as current management strategies have produced an over-exploitation crisis in a  
61 multitude of fisheries across the globe (15, 16), threatening both aquatic biodiversity (17) and the  
62 aforementioned food security (12). Traditionally, fishery sustainability goals have been implemented into  
63 policy on a single-fishery basis as a yield optimization process called maximum sustainable yield (MSY)  
64 (12). However, MSY's conventional consideration of harvested species in isolation, instead of part of a  
65 broader food-web (14, 18, 19), has limited its ability to address the indirect effects of harvesting seen in  
66 more network based approaches. Specifically, the population variability induced directly through fishing  
67 effort on harvested species (20) can transfer to non-harvested species through trophic interactions (5, 21).  
68 This variability has been linked to perturbations causing reductions in aquatic biodiversity (22, 23) and  
69 ecosystem function (24). These reductions cycle back to further affect harvested species (5, 25) and the  
70 potential economic returns harvested species provide (15, 26). Any effect on economic returns can  
71 impact future fishing effort and the corresponding effect on harvested ecosystems, creating a bio-  
72 economic feedback loop. While this bio-economic loop is understood in concept, limited work exists on  
73 its actual dynamics, especially in the context of broader ecological networks (27). We propose that  
74 attempts to understand and manage fishery dynamics must consider economic factors in the network as  
75 integrated ecological economic models (13). Otherwise, until more is known about the complex  
76 interactions between ecological and economic factors driving fishing efforts, policy makers risk  
77 attempting to optimize a process we poorly understand.

78           In accordance with such concerns, we applied network theory to incorporate the ecological  
79 complexity of species trophic interactions into the model. This differs from past approaches using  
80 Ecopath with Ecosim (28) which rely on extensive lists of system- and species-specific parameters to  
81 create models to effectively manage specific systems. The network approach allows for the development  
82 of more fundamental, widely-applicable theory because network models can be run across an array of  
83 ecological configurations, both empirical (5) and realistically generated (29), by parameterizing  
84 metabolism and species interactions through allometry (30). In this study we generated networks as food  
85 webs using the Niche Model (31), each with an initial 30 interacting trophic species. Species available for  
86 harvest are labeled “fish” for ease of description (Fig 1a). Ecological dynamics in each web were  
87 governed by a series of ordinary differential equations and parameterized through allometrically scaled  
88 rates (30) creating Allometric-Trophic Network (ATN) models (see Methods, 32). Finally, the network  
89 approach also provides a flexible framework which facilitates the integration of economic dynamics.

90           We incorporated two economic models driving fishing effort into the ATN’s ecological network  
91 structure with fisheries functioning as an additional node in the networks. After an initialization period of  
92 4000 time steps, roughly 11 years in model time (see Methods; 32) (Fig 1b), each “conserved” food-web  
93 (see Methods; 32) is subjected to two fishery treatments (Fig 1c): (1) Fixed Effort and (2) Open Access.  
94 The Fixed Effort treatment uses fixed levels of fishing effort starting immediately after the initialization  
95 period and do not change within simulations (Fig 1d). In the Open Access treatment, on the other hand,  
96 fishing Effort is unregulated (33). Instead, Effort adjusts in response to fishing profits, with Effort growth  
97 and decline occurring in response to positive and negative net profits respectively (Fig 1e). Profits are  
98 influenced by yield and market price. Market price is related to yield through a dynamic linear pricing  
99 model (see Methods; 32) (Fig S1). The Fixed Effort treatment serves as a control to the dynamics of  
100 Open Access fisheries, but it also has real world representations in strictly permitted fisheries used for  
101 subsistence fishing (34). The Open Access treatments simulate fisheries from their initialization at  $t=4000$   
102 and therefore start from a low initial Effort of 1. Effects of different economic conditions are studied by  
103 parameter sweeps across levels of price sensitivity to yield ( $b$ ), Effort’s sensitivity to changes in profit ( $\mu$ ),

104 and maximum price ( $a$ ) paid for the harvested species. See Methods section for more (32). Fisheries are  
105 single-species, with the harvested fish per simulation labeled,  $H$ .

106 We use our dynamic model to evaluate the economic and ecological factors which determine: (1)  
107 the impact of fishing on harvested and non-harvested species (ecological impacts), (2) the conditions for  
108 fishery “success” (i.e., a sustained non-0 fishing effort), and (3) the different ecological impacts of  
109 fisheries within Fixed and Open Access regimes.

110 When we implement fishing through the Fixed Effort treatment, higher Effort levels increase  $H$   
111 mortality, intuitively causing more biomass depletion (Fig S2), more extinctions (Fig S3), and quicker  
112 times to extinction (Fig 2a) for the harvested species,  $H$ . Among the hundreds of ecological factors  
113 analyzed (see Methods), we found those  $H$  extinctions to be more prevalent at higher trophic levels (Fig  
114 S4; Fig 2b), reflecting numerous empirical examples (35-37). Interestingly though, the best ecological  
115 predictor of  $H$ -extinctions, the population biomass of  $H$  at the start of fishing ( $B_{H0}$ ; Table S1), has a non-  
116 linear effect (Fig 2b; Fig S5a). Compared to the lowest  $B_{H0}$ , moderate increases in starting population  
117 biomass decreased  $H$  extinction prevalence, as more abundant harvested populations are resistant to the  
118 extraction induced mortality. However, for all but the highest trophic levels, we saw that further increases  
119 in  $B_{H0}$  escalate extinction risk of  $H$ .

120 This non-linearity occurs because fishing higher  $B_{H0}$  generally induces greater levels of  
121 variability in the rest of the community’s populations (Fig S6; see Methods), mirroring past work that  
122 finds greater population variability when removing species with higher biomasses (29) (Table S2). Higher  
123 levels of variability generate extinction cascades of non-harvested species ( $N$ - $H$  extinctions; Fig S7)  
124 which threaten  $H$  through its prey items. The association of  $B_{H0}$ , population variability, and  $N$ - $H$   
125 extinctions functions as the mechanism behind  $B_{H0}$  causing higher levels of  $N$ - $H$  extinctions (Fig 2c; Fig  
126 S5b; Fig S8). In fact,  $B_{H0}$  is also the best single pre-fishing predictor of  $N$ - $H$  extinctions (Table S3) and  
127 its effects are exacerbated when higher Effort levels induce stronger perturbations in the community (Fig  
128 2c; Fig S6; Table S3). The majority of these  $N$ - $H$  extinctions occur downstream from  $H$  (Fig S9a), and are

129 trophically close to  $H$  (Fig S9b) with the average distance becoming closer with a higher number of  
130 trophic links to  $H$  (Fig S10). As such, we clearly see that the degree of losses in  $H$ 's prey options  
131 increases proportionally with general  $N$ - $H$  extinctions ( $\beta = 1.5$ ,  $p < .0001$ ,  $R^2 = 0.75$ ; Fig 2d). The  
132 relatively high level of downstream extinctions relative to upstream extinctions is at least partially due to  
133 the size constraints on the food-webs and the fish trophic levels studied here, but these results do indicate  
134 that perturbations due to fishing can cycle through the food web and threaten even highly abundant  
135 harvested species through their prey items.

136 In the Open Access treatment,  $B_{H0}$  also played a critical role in fishery sustainability as it was a  
137 principal driver of market dynamics. Open Access Effort is dynamic, capable of both declines and growth  
138 (Fig 3a). Growth in Open Access Effort is a function of  $B_{H0}$  and the maximum price of  $H$ , the parameter  
139  $a$ . Higher max price reflects higher base demand for  $H$  and higher  $B_{H0}$  provides potential yield to meet  
140 demand, thereby driving greater profits and Effort (Fig S11a). Dependent upon demand and yield, Effort  
141 levels can range from low to high values. However, with sufficiently low demand or yield, net profit is  
142 consistently negative, Effort declines to 0, meaning the fishery fails to sustain itself (Fig S12).  
143 Consequently, harvesting the most abundant fish per web sustained more fisheries (78% of simulations)  
144 than fishing randomly chosen fish populations (26% of simulations). Though, higher prices/demand can  
145 sustain Effort on low abundance species by supporting higher profits on lower yield (Fig S13). This  
146 growth potential in the combination of max price ( $a$ ) and harvestable biomass ( $B_{H0}$ ) strongly predicts the  
147 peaks in Effort early in Open Access fisheries' time series (Fig 3a&3b; Table S4; Table S5).

148 However, growth itself, if unchecked, can also lead to Effort declines during the "cycle of  
149 adjustment (38)," an empirically detected bio-economic process (39). That is, we see Effort reductions  
150 (Fig 3a) when past fishing effort has either over-supplied and caused market-saturation (reductions  
151 through price sensitivity to yield,  $b$ ) or over-fished  $H$  (reductions through a lack of biomass from which to  
152 profit). These mechanisms of reactionary Effort reduction can function as "self-corrections" that  
153 potentially protect against excessive fishing Effort, allowing for regrowth in the harvested populations.

154 These self-corrections, coupled with the potential for Open Access fisheries to fail to sustain Effort at low  
155  $B_{H0}$ , explain the relative lack of  $H$  extinctions in the Open Access tests (Fig S11b). However, especially  
156 in fisheries with high growth potential (high prices and  $B_{H0}$ ) where Effort is highly sensitive to profit  
157 (high  $\mu$ ), the combination of sufficiently high price ( $a$ ) and high  $B_{H0}$  elevates Effort to levels (Fig 3b)  
158 inducing  $H$  extinctions before self-correction occurs (Fig 3c). Analyzing Open Access fishery outcomes  
159 reveals three general economic categories: (1) failed fisheries due to low  $B_{H0}$  and price ( $a$ ) failing to  
160 maintain or grow Effort, (2) failed fisheries due to high  $B_{H0}$  and price driving  $H$  extinctions through  
161 excessive Effort, and (3) sustained fisheries existing in a middle ground between the two (Fig 3d).

162 These three general economic outcomes underpin much of the relationship between the harvested  
163 species and fishing Effort in Open Access fisheries. In particular, these results indicate that  $H$  extinctions  
164 were actually most common when harvesting highly abundant  $H$  (species with high  $B_{H0}$ ) as unregulated  
165 growth in Effort depleted fish reserves (Fig S14). This also formed the basis of the non-linear effect  $B_{H0}$   
166 had on Open Access fishery persistence (Fig 4a) and the level of Effort sustained by the end of the  
167 simulation (Fig 4b). Additionally, while  $H$  extinctions were relatively less common, the link between  
168 harvestable biomass and Effort growth reversed the relationship between  $B_{H0}$  and time to  $H$  extinction  
169 seen in Fixed Effort fisheries (compare Fig 2a to Fig 4c). Finally, the dynamics of Effort in response to  
170 yield also drive the different effects of fishing on the rest of the community between Open Access and  
171 Fixed Effort fisheries.

172 The profit-driven growth in Effort caused by high  $B_{H0}$  means that (given sufficient demand)  
173 economic factors incentivize subjecting food-webs to high levels of harvesting pressure on their more  
174 abundant species. This induces more variability in the biomass of the rest of the community than Fixed  
175 Effort fisheries (Fig S15). Expectedly (Fig S7), market generated variability induced more non-harvested  
176 ( $N-H$ ) extinctions than Fixed Effort simulations. This was the case whether comparisons between Fixed  
177 Effort and Open Access results were made with attainable Efforts levels across all webs (Fig 4d; Fig S16;

178 Fig S17) or strictly within each web at the most comparable Effort levels between fishery treatments (Fig  
179 4e).

180 While our model framework has not yet been applied to multi-species fisheries or to realistically  
181 regulated fisheries, it can qualitatively reproduce past theoretical results (29) (Table S2), well-  
182 documented empirical patterns (Fig S4), and output from models specifically trained on empirical data  
183 (23) (Fig S18). This gives us confidence in vetting our results and further applying this framework  
184 towards the study of operational ecosystem based fisheries management (EBFM) strategies (27). Model  
185 output demonstrates the striking nonlinear effects of the population biomass of harvested species ( $B_{H0}$ ) on  
186 both the ecological and economic sustainability of fishing. It also reveals the role of  $B_{H0}$  in driving  
187 variations in Effort and exacerbating the ecological costs of harvesting in Open Access fisheries.  
188 Temporary fluctuations in Effort above sustainable levels are a known process in the cycles of adjustment  
189 seen in Open Access fisheries (33), but we show here that the indirect effects of those fluctuations can  
190 drastically change food-web structure. Overall, our results indicate that considering the sustainability of  
191 even one aspect of an ecosystem service likely requires a holistic accounting of both the ecology that  
192 provides the service and the economy that the service provides.

## 193 **References and Notes**

- 196 1. M. Pascual, J. A. Dunne (Eds.) *Ecological networks: linking structure to dynamics in food webs*  
197 (Oxford University Press, 2006).
- 198 2. F. S. Valdovinos, Mutualistic networks: moving closer to a predictive theory. *Ecology Letters*, **22**(9),  
200 1517-1534 (2019).
- 201 3. J. M. Tylianakis, R. K. Didham, J. Bascompte, D.A. Wardle, Global change and species interactions in  
202 terrestrial ecosystems. *Ecology Letters*, **11**(12), 1351-1363 (2008).
- 203 4. A. Binzer, C. Guill, B.C. Rall, U. Brose, Interactive effects of warming, eutrophication and size  
204 structure: impacts on biodiversity and food-web structure. *Global Change Biology*, **22**(1), 220-227 (2016).
- 205 5. A. Kuparinen, A. Boit, F.S. Valdovinos, H. Lassaux, N.D. Martinez, Fishing-induced life-history  
206 changes degrade and destabilize harvested ecosystems. *Scientific Reports*, **6**, 22245 (2016).
- 207 6. F.S. Valdovinos, E.L. Berlow, P.M. De Espanés, R. Ramos-Jiliberto, D.P. Vázquez, & N.D. Martinez,  
208 Species traits and network structure predict the success and impacts of pollinator invasions. *Nature*  
209 *Communications*, **9**(1), 2153 (2018).
- 210
- 211
- 212
- 213



- 214  
215 7. J.A. Dunne, R.J. Williams, N.D. Martinez, Network structure and biodiversity loss in food webs:  
216 robustness increases with connectance. *Ecology Letters*, **5**(4), 558-567 (2002).  
217
- 218 8. J. Liu, T. Dietz, S.R. Carpenter, M. Alberti, C. Folke, E. Moran, E. Ostrom, Complexity of coupled  
219 human and natural systems. *Science*, **317**(5844), 1513-1516 (2007).  
220
- 221 9. NSF 19-528 Program Solicitation, CNH2: Dynamics of Integrated Socio-Environmental Systems  
222 (CNH2) (2018), (available at <https://www.nsf.gov/pubs/2019/nsf19528/nsf19528.htm>).  
223
- 224 10. J.A. Dunne, H. Maschner, M.W. Betts, N. Huntly, R. Russell, R.J. Williams, S.A. Wood, The roles  
225 and impacts of human hunter-gatherers in North Pacific marine food webs. *Scientific Reports*, **6**, 21179  
226 (2016).  
227
- 228 11. N.D. Martinez, P. Tonnin, B. Bauer, R.C. Rael, R. Singh, S. Yoon, ... & J.A. Dunne, Sustaining  
229 economic exploitation of complex ecosystems in computational models of coupled human-natural  
230 networks. In Twenty-Sixth AAAI Conference on Artificial Intelligence. Toronto, ON, Canada, July 22,  
231 2012.  
232
- 233 12. Food and Agriculture Organization (FAO), “The state of world fisheries and aquaculture 2016” (Food  
234 and Agriculture Organization of the United Nations, 2016).  
235
- 236 13. J.R. Nielsen, E. Thunberg, J.O Schmidt, D. Holland, F. Bastardie, J.L. Andersen, ... & G. Carpenter,  
237 Evaluation of integrated ecological-economic models—Review and challenges for implementation. In  
238 ICES Annual Science Conference, Copenhagen, Denmark, 2015.  
239
- 240 14. J.S. Collie, L.W. Botsford, A. Hastings, I.C. Kaplan, J.L. Largier, P.A. Livingston, E. Plagányi, K.A.  
241 Rose, B.K. Wells, F.E. Werner. Ecosystem models for fisheries management: Finding the sweet spot.  
242 *Fish and Fisheries* **17**, 101–125 (2016).  
243
- 244 15. B. Worm, E.B. Barbier, N. Beaumont, J.E. Duffy, C. Folke, B.S. Halpern, J.B.C. Jackson, H.K Lotze,  
245 F. Micheli, S.R. Palumbi, E. Sala, K.A. Selkoe, J.J. Stachowicz, R. Watson, Impacts of biodiversity loss  
246 on ocean ecosystem services. *Science* **314**, 787-790 (2006).  
247
- 248 16. World Wildlife Foundation (WWF), Living Planet Report - 2018: Aiming Higher. Grooten, M. and  
249 Almond, R.E.A.(Eds). WWF, Gland, Switzerland (2018).  
250
- 251 17. C. Costello, D. Ovando, T. Clavelle, C.K. Strauss, R. Hilborn, M.C. Melnychuk, ... & D.N. Rader,  
252 Global fishery prospects under contrasting management regimes. *Proceedings of the National Academy of*  
253 *Sciences*, **113**(18), 5125-5129 (2016).  
254
- 255 18. R.W. Zabel, C.J. Harvey, S.L. Katz, T.P. Good, P.S. Levin, Ecologically sustainable yield: marine  
256 conservation requires a new ecosystem-based concept for fisheries management that looks beyond  
257 sustainable yield for individual fish species. *American Scientist* **91**(2), 150-157 (2003).  
258
- 259 19. E.K. Pikitch, C. Santora, E.A. Babcock, A. Bakun, R. Bonfil, D.O. Conover, P. Dayton, P.  
260 Doukakis, D. Fluharty, B. Heneman, E.D. Houde, Ecosystem-based fishery management. *Science*. 346-  
261 347 (2004).  
262
- 263 20. C.H. Hsieh, C.S. Reiss, J.R. Hunter, J.R. Beddington, R.M. May, G. Sugihara, Fishing elevates  
264 variability in the abundance of exploited species. *Nature* **443**, 859–862 (2006).

- 265  
266 21. A. Perez-Matus, A. Ospina-Alvarez, P.A. Camus, S.A. Carrasco, M. Fernandez, S. Gelcich, ... & M.D.  
267 Subida, Temperate rocky subtidal reef community reveals human impacts across the entire food web.  
268 *Marine Ecology Progress Series*, **567**, 1-16 (2017).  
269  
270 22. K.T. Frank, B. Petrie, J.S. Choi, W.C. Leggett, Trophic cascades in a formerly cod-dominated  
271 ecosystem. *Science*, **308**(5728), 1621-1623 (2005).  
272  
273 23. A.D.M. Smith, C.J. Brown, C.M. Bulman, E.A. Fulton, P. Johnson, I.C. Kaplan, H. Lozano-Montes, S.  
274 Mackinson, M. Marzloff, L.J. Shannon, Y-J Shin, J. Tam, Impacts of fishing low-trophic level species on  
275 marine ecosystems. *Science* **333**, 1147-1150 (2011).  
276  
277 24. P.B. McIntyre, L.E. Jones, A.S. Flecker, M.J. Vanni, Fish extinctions alter nutrient recycling in  
278 tropical freshwaters. *Proceedings of the National Academy of Sciences*, **104**(11), 4461-4466 (2007).  
279  
280 25. Z.T. Wood, E.P. Palkovacs, M.T. Kinnison, Eco-evolutionary Feedbacks from Non-target Species  
281 Influence Harvest Yield and Sustainability. *Scientific Reports*. **8**(1), 6389 (2018).  
282  
283 26. C.N. Anderson, C.H. Hsieh, S.A. Sandin, R. Hewitt, A. Hollowed, J. Beddington, ... & G. Sugihara,  
284 Why fishing magnifies fluctuations in fish abundance. *Nature*. **452**(7189), 835 (2008).  
285  
286 27. K.N. Marshall, P.S. Levin, T.E. Essington, L.E. Koehn, L.G. Anderson, A. Bundy, C. Carothers, F.  
287 Coleman, L.R. Gerber, J.H. Grabowski, E. Houde, Ecosystem-based fisheries management for social-  
288 ecological systems: Renewing the focus in the United States with next generation fishery ecosystem plans.  
289 *Conserv Lett* 11:e12367 (2018).  
290  
291 28. C. Villy, M. Coll, C. Piroddi, J. Steenbeek, J. Buszowski, D. Pauly, A century of fish biomass decline  
292 in the ocean. *Marine Ecology Progress Series* **512**, 155-166 (2014).  
293  
294 29. E.L. Berlow, J.A. Dunne, N.D. Martinez, P.B. Stark, R.J. Williams, U. Brose, Simple prediction of  
295 interaction strengths in complex food webs. *Proceedings of the National Academy of Sciences*, **106**(1),  
296 187-191 (2009).  
297  
298 30. P. Yodzis, S. Innes, Body size and consumer-resource dynamics. *The American Naturalist* **136**(6):  
299 1151-1175 (1992).  
300  
301 31. R.J. Williams, N.D. Martinez, Simple rules yield complex food webs. *Nature* **404**, 180-183 (2000).  
302  
303 32. Materials and methods are available as supplementary materials at the Science website.  
304  
305 33. K. Fuller, D. Kling, K. Kroetz, N. Ross J.N. Sanchirico, Economics and Ecology of Open-Access  
306 Fisheries. In: Shogren, J.F., (ed.) Encyclopedia of Energy, Natural Resource, and  
307 Environmental Economics. **2**, 39-49 Amsterdam: Elsevier. (2013)  
308  
309 34. J.A. Fall, L.B. Hutchinson-Scarborough, B.E. Jones, M. Kukkonen, T. Lemons, A. Godduhn, ... & L.  
310 Sill, Alaska subsistence and personal use salmon fisheries 2012 annual report. *Alaska Department of Fish*  
311 *and Game, Division of Subsistence* (2014).  
312  
313 35. D. Pauly, V. Christensen, J. Dalsgaard, R. Froese, F. Torres, Fishing down marine food webs. *Science*,  
314 **279**(5352), 860-863 (1998).  
315

- 316 36. K.M. Freire, D. Pauly, Fishing down Brazilian marine food webs, with emphasis on the east Brazil  
317 large marine ecosystem. *Fisheries Research*, **105**(1), 57-62 (2010).  
318
- 319 37. B.B. Collette, K.E. Carpenter, B.A. Polidoro, M.J. Juan-Jordá, A. Boustany, D.J. Die, ... R. McManus,  
320 High value and long life—double jeopardy for tunas and billfishes. *Science*, **333**(6040), 291-292 (2011).  
321
- 322 38. V.L. Smith, On models of commercial fishing. *Journal of Political Economy*. **77**, 181–198 (1969).  
323
- 324 39. J.E. Wilen, Common property resources and the dynamics of overexploitation: the case of the North  
325 Pacific fur seal. *Marine Resource Economics*. **33**(3), 217-243 (2018).  
326
- 327 40. F.S. Valdovinos, R. Ramos-Jiliberto, J.D. Flores, C. Espinoza, G. López, Structure and dynamics of  
328 pollination networks: the role of alien plants. *Oikos*. **118**(8), 1190-1200 (2009).  
329
- 330 41. R.J. Williams, N.D. Martinez, Stabilization of chaotic and non-permanent food web dynamics. *Eur.*  
331 *Phys. J. B*. **38**, 297–303 (2004).  
332
- 333 42. R.J. Williams, Effects of network and dynamical model structure on species persistence in large  
334 model food webs. *Theoretical Ecology* **1**, 141-151 (2008).  
335
- 336 43. U. Brose, R.J. Williams, N.D. Martinez, Allometric scaling enhances stability in complex food webs.  
337 *Ecology Letters*. **9**, 1228-1236 (2006).  
338
- 339 44. F.D. Schneider, U. Brose, B.C. Rall, C. Guill, Animal diversity and ecosystem functioning in dynamic  
340 food webs. *Nature Communications*. **7**, 12718 (2016).  
341
- 342 45. R.J. Williams, U. Brose, N.D. Martinez, Homage to Yodzis and Innes 1992: scaling up feeding-based  
343 population dynamics to complex ecological networks. *From energetics to ecosystems: the dynamics and*  
344 *structure of ecological systems*, 37-51, (Springer, Dordrecht, 2007).  
345
- 346 46. J.H. Brown, J.F. Gillooly, A.P. Allen, V.M. Savage, G.B. West, Toward a metabolic theory of  
347 ecology. *Ecology*. **85**(7), 1771-1789 (2004).  
348
- 349 47. A. Boit, N.D. Martinez, R.J. Williams, U. Gaedke, Mechanistic theory and modelling of complex  
350 food-web dynamics in Lake Constance. *Ecology Letters*. **15**(6), 594-602 (2012).  
351
- 352 48. J.M. Conrad, *Resource economics*. (Cambridge University Press, Cambridge UK, 1999).  
353
- 354 49. L. Breiman, L. Algorithm CART. Classification and Regression Trees. California Wadsworth  
355 International Group, Belmont, California (1984).  
356
- 357 50. R Core Team, R: A language and environment for statistical computing. R Foundation for Statistical  
358 Computing, Vienna, Austria. (2014), (available at <http://www.R-project.org/>).  
359
- 360 51. S.N. Wood, Stable and efficient multiple smoothing parameter estimation for generalized additive  
361 models. *Journal of the American Statistical Association*. **99**, 673-686 (2004).  
362
- 363 52. F. Cribari-Neto, A. Zeileis, Beta regression in R. *Journal of Statistical Software*, **34**, 1–24 (2010).  
364
- 365 53. M. Torchiano, effsize: Efficient Effect Size Computation. doi: 10.5281/zenodo.1480624, R package  
366 version 0.7.4 (2018), (available at <https://CRAN.R-project.org/package=effsize>).

367  
368  
369  
370  
371  
372  
373  
374  
375  
376  
377  
378  
379  
380  
381  
382  
383  
384  
385  
386  
387  
388  
389  
390  
391  
392

**Acknowledgements:** We would like to thank Kailin Kroetz, Maria Isidora Avila, the Valdovinos lab, and the researchers at the “Socio-Environmental Networks of Common Pool Resources” Working Group at National Socio-Environmental Synthesis Center (SESYNC) for feedback on study design, results, and interdisciplinary communication. We would also like to thank John Megahan for his assistance in producing the figures for publication.

**Funding:** No outside funding was applied to this study.

**Author Contributions:** FSV conceived study. FSV, PG, and VC designed study. VC and PG wrote and implemented simulation code. PG and FSV completed analysis and wrote manuscript.

**Competing Interests:** The authors declare no competing interests.

**Data and Materials Availability:** Simulation code and data will be available upon acceptance at the repository [https://github.com/fsvaldovinos/Bioecon\\_Fisheries](https://github.com/fsvaldovinos/Bioecon_Fisheries).

**Supplementary Material:**

Materials and Methods  
Figures S1 – S18  
Tables S1 – S6  
References (40 – 53)

**Figures**

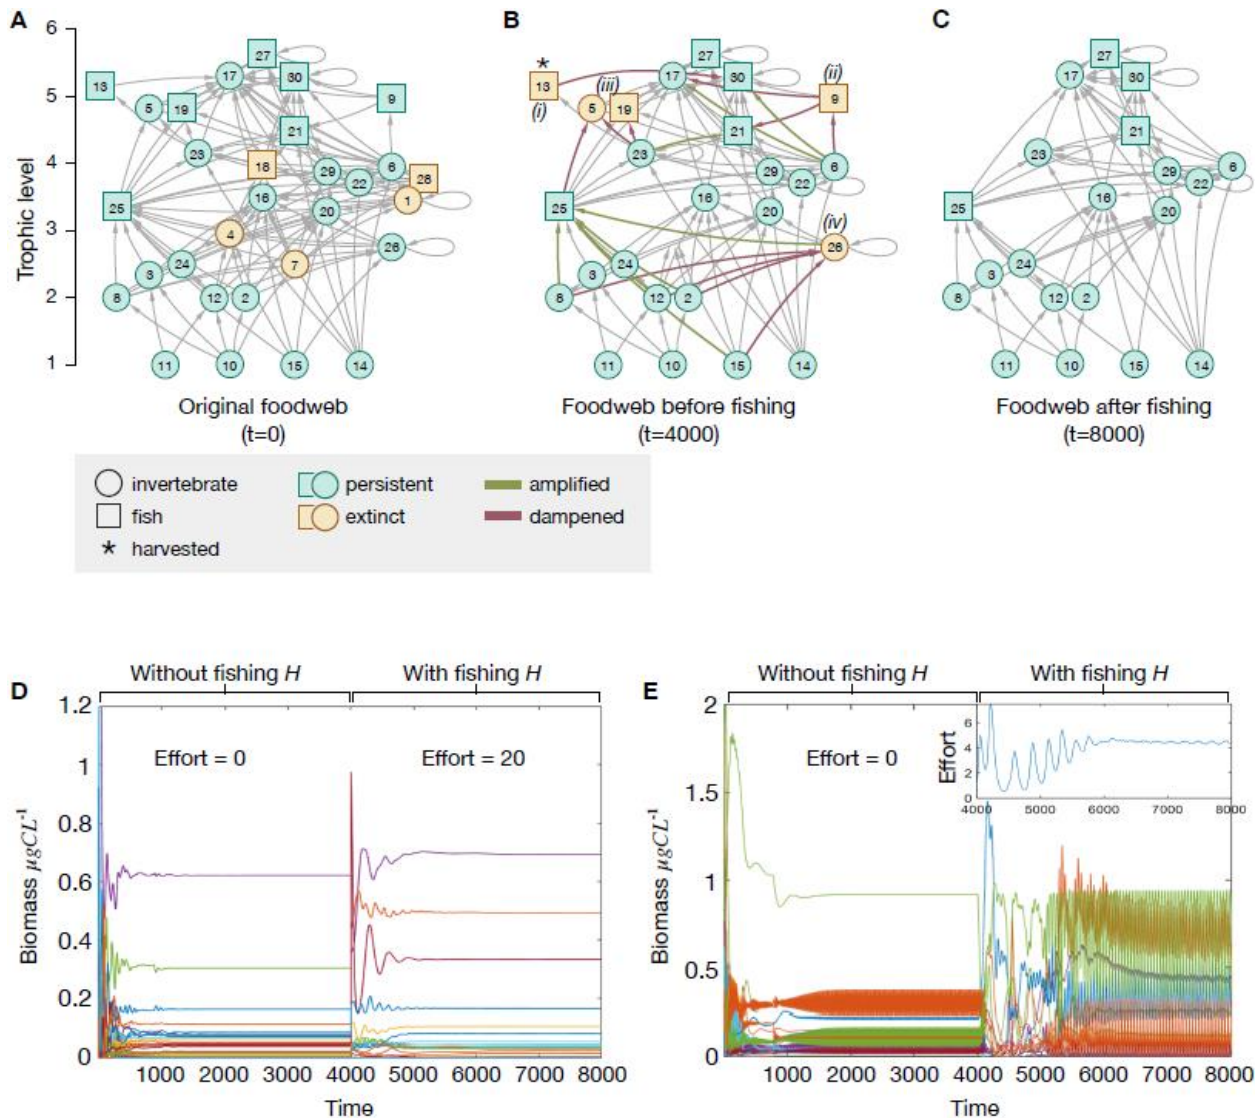

**Figure 1: Diagrams of the experimental design.** a-c) Example evolution of a food web structure across complete simulation process with a Fixed Effort of 5. Node sizes are logarithmically scaled to the biomass at each point in time of the simulation. Edges between nodes represent trophic interactions with arrows indicating the consumer. The vertical axis indicates the trophic level of trophic species. a) The example food web at initialization (t=0). Colors of nodes indicate species that will survive or go extinct after initialization. b) The example food web after initialization and before fishing effort (t=4000). Colors of nodes indicate species that will survive or go extinct after fishing. Indices (i) – (iv) indicate the order of extinctions during simulation. c) The final structure of the food web after the fixed harvesting effort (t=8000). d) Example simulation of a FE treatment simulation with effort set at 20. e) Example simulation of an Open Access treatment simulation.

393  
 394  
 395  
 396  
 397  
 398  
 399  
 400  
 401  
 402  
 403  
 404  
 405

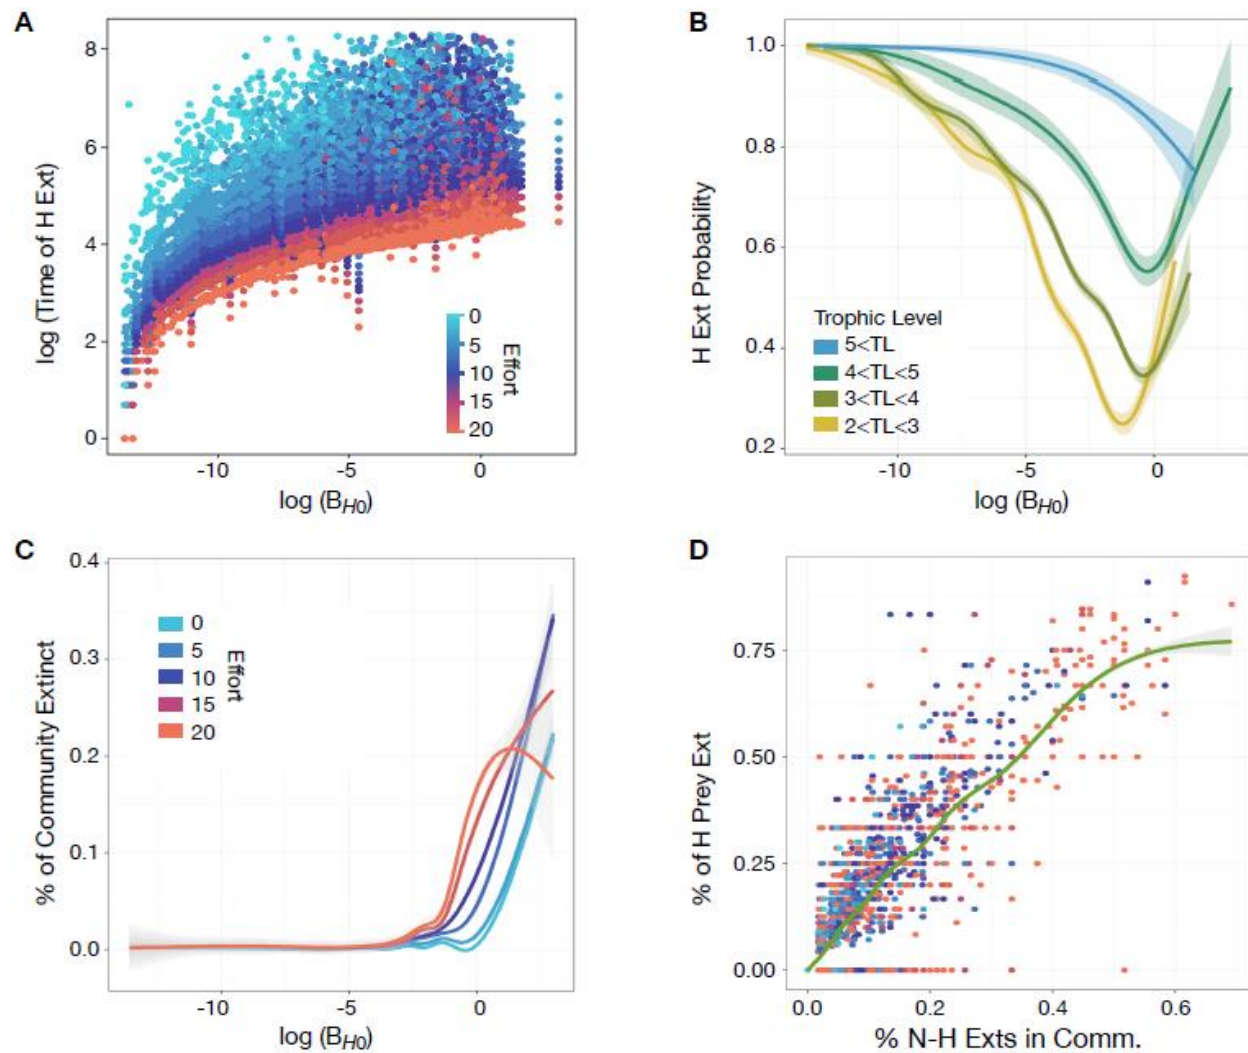

406  
 407 **Figure 2: Fixed Effort results.** a) Scatterplot showing the effect of  $\log(B_{H0})$  on time to  $H$  extinction. b)  
 408 Generalized additive model (GAM) binomial regression of the effects of  $\log(B_{H0})$  on the probability of  
 409 fishing resulting in  $H$  extinction across four trophic level groupings of  $H$ . Lines represent fit and shaded  
 410 regions show 95% confidence interval. Including  $\log(B_{H0})$ , trophic level of  $H$ , and Fixed Effort level  
 411 gives the binomial GAM results: 51.1% of variance explained at  $R^2=0.57$ , UBRE=-0.32. c) GAM  
 412 regressions showing the percent of the community lost based on  $\log(B_{H0})$ . Lines represent fit and shaded  
 413 regions show 95% confidence interval. Higher Effort levels (e.g. E=15, 20) do present a non-linear trend  
 414 at high  $B_{H0}$ . This is due to the expedited  $H$  extinctions at high Effort levels ending the active fishing  
 415 disturbance on the rest of the community quicker than lower Effort levels. See Fig S6 for more. d) Scatter  
 416 plot showing positive relative relationship between the percent of community lost to  $N-H$  extinctions  
 417 and the percent of  $H$ 's prey items lost. Colors represent Fixed Effort values similar to Fig 2a and the  
 418 green line represents GAM regression fit with 95% confidence interval.  
 419

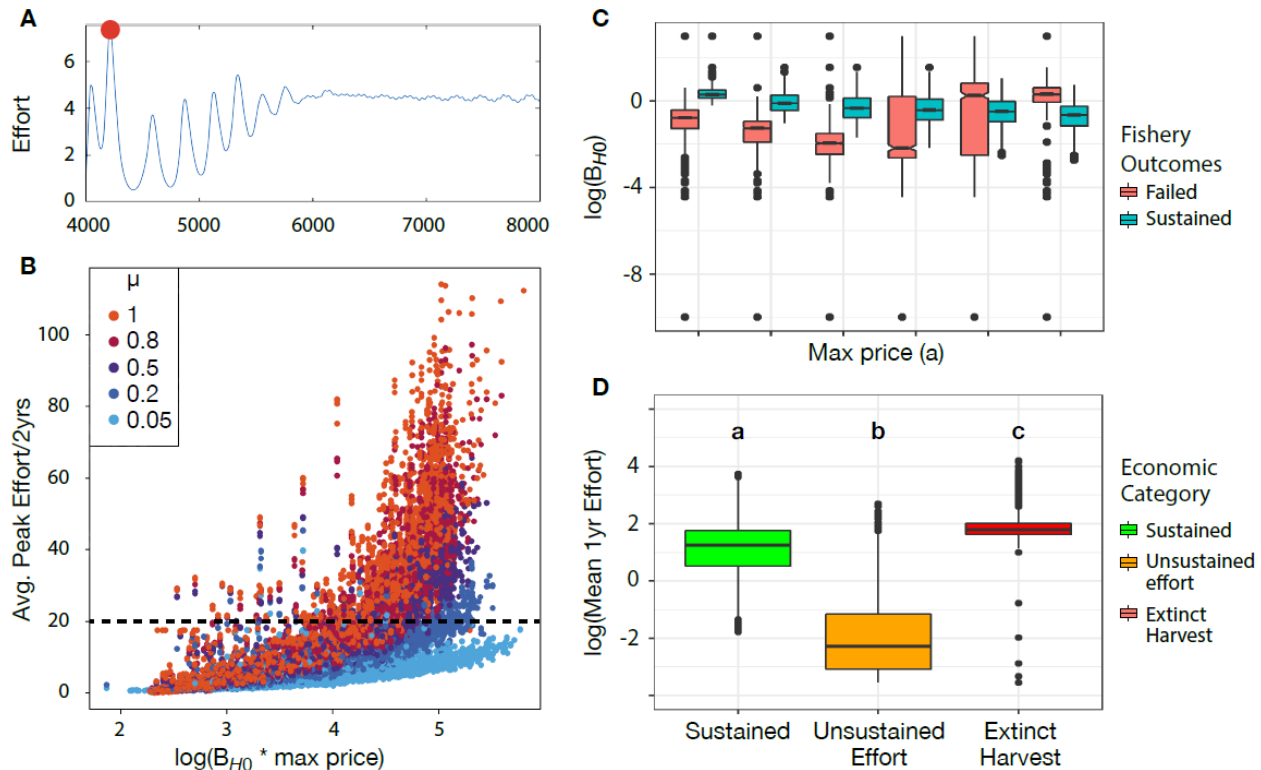

420  
421  
422  
423  
424  
425  
426  
427  
428  
429  
430  
431  
432  
433  
434  
435  
436  
437

**Figure 3: Open Access results.** a) Example of effort dynamics where red dot represents a local peak effort. b) Peak efforts averaged across two years per the product of starting biomasses of harvested species ( $B_{H0}$ ) and max price ( $a$ ). Colors indicate the value of  $\mu$ , economic sensitivity/reactivity of the Effort per simulation. c) Box-plot showing  $B_{H0}$  of failed and sustained fisheries across different Max Price ( $a$ ) when fishing the max  $B_{H0}$  fish population per food-web. Increasing  $a$  supports sustained fishing effort in less abundant fisheries until spiking effort peaks produced by higher profits when fishing abundant species cause the  $H$ -extinctions and fishery failure. d) Three economic outcomes characterized by efforts averaged across the first fishing year. Sustained (green) fisheries exhibit intermediate efforts producing enough profit without collapsing the resource. Unsustained (orange) fisheries failed before causing species extinctions because their profits were lower than harvesting costs. Extinct (red) fisheries failed because high profits produce high effort peaks causing the harvested-species extinction. Significant differences indicated by different letters (Tukey HSD,  $p < 2e^{-16}$ ). In boxplots of Fig 3c and 3d, boxes represent the interquartile range with the horizontal line showing the median, the lower box representing the 25 percentile, and the upper box showing the 75 percentile. Upper and lower lines extending from the boxes show the most extreme values within 1.5 times the 75<sup>th</sup> and 25<sup>th</sup> percentile respectively. Outliers are shown as single dots.

438

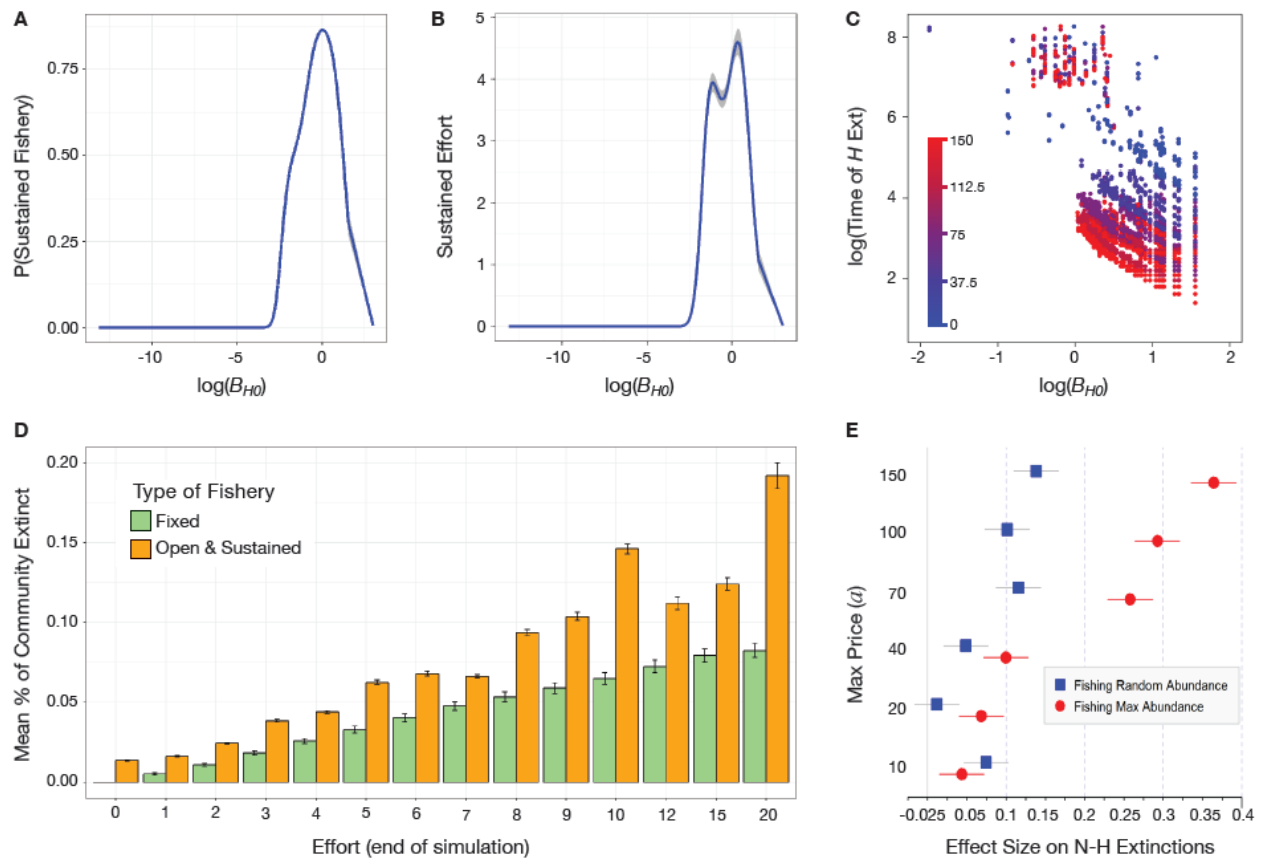

439

440

441

442

443

444

445

446

447

448

449

450

451

452

453

**Figure 4: Open Access fishery's economic and ecological sustainability results.** a) Probability of producing a sustainable Open Access fishery across the  $B_{H0}$  of  $H$ . Graph depicts the non-linear output of a binomial GAM regression with 95% confidence interval ( $R^2 = 0.47^{***}$ , UBRE=-0.20). b) Sustained Open Access effort measured as average of final 400 time steps approaching  $t=8000$ . Graph depicts non-linear output of a gaussian GAM regression with 95% confidence interval ( $R^2 = 0.37$ , GCV=9.60). c) Scatterplot showing the effect of  $\log(B_H)$  on time to  $H$  extinction in Open Access simulations. Note the qualitatively reversed relationship from Fixed Effort fisheries. Color gradient represents the max price effort ( $a$ )\* the market reactivity ( $\mu$ ). d) Bar graph with standard error comparing the percent of the community lost through  $N-H$  extinctions in Fixed Effort fisheries to Open Access fisheries with comparable effort levels at  $t=8000$ . E) Hedge's G effect size comparison of the two fishery treatments (Fixed and Open Access) on  $N-H$  extinctions across different max prices ( $a$ ). Dots represent effect size and lines show 95% confidence intervals. Comparisons are made within webs at comparable effort levels (see Methods; 32).
